# Supplementary material for: Cancer Immunotherapy with Lipid Nanoparticles Loaded with a Stimulator of Interferon Genes Agonist against Renal Tumor Lung Metastasis
Source: MDPI journal article supplement (doi:10.3390/pharmaceutics16010031), 2023-12-26
Supplement: s1 [file s1]

## **Supplementary data**

Cancer immunotherapy with lipid nanoparticles loaded with a STING agonist against renal tumor lung metastasis.

Takashi Nakamura<sup>\*</sup>, Shun Sasaki, Yusuke Sato, Hideyoshi Harashima<sup>\*</sup>

Faculty of Pharmaceutical Sciences, Hokkaido University, Kita-12, Nishi-6, Kita-ku, Sapporo 060-0812, Japan

**\*Correspondence:**

Takashi Nakamura

Faculty of Pharmaceutical Sciences, Hokkaido University

Sapporo, Hokkaido 060-0812, Japan.

Telephone: +81-11-706-3735, Fax: +81-11-706-3734

E-mail: [tnakam@pharm.hokudai.ac.jp](mailto:tnakam@pharm.hokudai.ac.jp)

Hideyoshi Harashima

Faculty of Pharmaceutical Sciences, Hokkaido University

Sapporo, Hokkaido 060-0812, Japan.

Telephone: +81-11-706-2197, Fax: +81-11-706-2197

E-mail: [harasima@pharm.hokudai.ac.jp](mailto:harasima@pharm.hokudai.ac.jp)

Table S1. Sequences of the primer pairs used for the RT-qPCR

| Gene         | Forward primer           | Reverse primer          |
|--------------|--------------------------|-------------------------|
| <i>Cd3</i>   | ATGCGGTGGAACACTTTCTGG    | GCACGTCAACTCTACACTGGT   |
| <i>Cd4</i>   | CTTCGCAGTTTGATCGTTTTGAT  | CCGGACTGAAGGTCACCTTTGA  |
| <i>Cd8</i>   | AAGAAAATGGACGCCGAACCTT   | AAGCCATATAGACAACGAAGGTG |
| <i>Foxp3</i> | TGCAGGGCAGCTAGGTACTTG    | TCGGAGATCCCCTTTGTCTTATC |
| <i>Ctla4</i> | CATGGTGTGCGCCAGCTTTC     | GGTAATCTAGGAAGCCCACTGTA |
| <i>Lag3</i>  | GGCCTCGATGATTGCTAGTCC    | CGGTGAGTTGTAGACAGGCA    |
| <i>Nkg2d</i> | GCACTAACTACCAGTCAACCTG   | CTCGAACAACGAACATTGGAGA  |
| <i>Ifng</i>  | ATGAACGCTACACACTGCATC    | CCATCCTTTTGCCAGTTCCTC   |
| <i>Cd11c</i> | CTGGATAGCCTTTCTTCTGCTG   | GCACACTGTGTCCGAACCTCA   |
| <i>Xcr1</i>  | CAGAGTCAGATGCTCTCAGTATCC | GGACAATGGTAGAGATGGTGGA  |
| <i>Ccl5</i>  | TGCTCCAATCTTGCAGTCGT     | GGCTAGGACTAGAGCAAGCAA   |
| <i>Gusb</i>  | GTGGTATGAACGGGAAGCAAT    | AACTGCATAATAATGGGCACTGT |

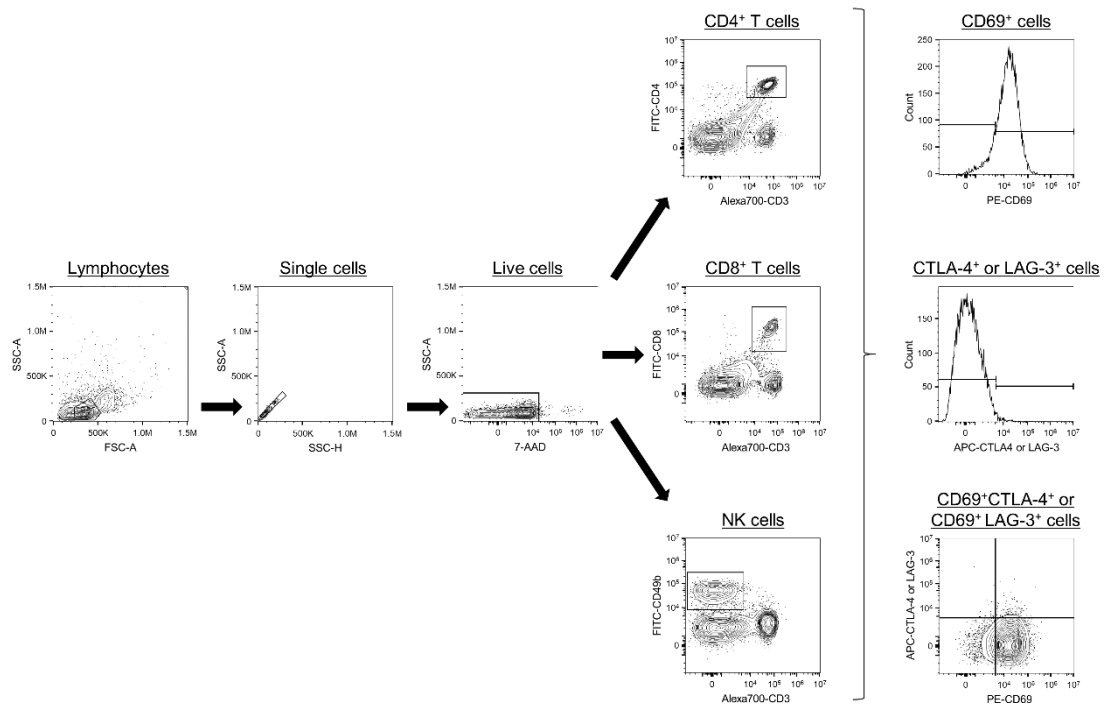

**Figure S1. Gating strategy for the FCM analysis of lungs with Renca metastasis.**

After gating the lymphocytes, single cells and gated live cells, CD4<sup>+</sup> T cells (CD3<sup>+</sup>CD4<sup>+</sup> cells), CD8<sup>+</sup> T cells (CD3<sup>+</sup>CD8<sup>+</sup> cells), NK cells (CD3<sup>-</sup>CD49b<sup>+</sup> cells) were identified. In each immune cell population, the CD69<sup>+</sup> gate, the CTLA-4<sup>+</sup> gate, the LAG-3<sup>+</sup> gate, the CD69<sup>+</sup>CTLA-4<sup>+</sup> gate, and the CD69<sup>+</sup>LAG-3<sup>+</sup> gate was set by using isotype controls.
